# Supplementary material
Source: MDPI journal article supplement (https://www.mdpi.com/2072-4292/15/3/547)
Supplement: s1 [file s1]

# Supplementary Material for Evaluating the value of CrIS shortwave infrared channels in atmospheric sounding retrievals

**Table S1:** Summary of the experiments discussed in this paper. Each experiment is defined by the CrIS bands used in the Regression and Optimal Estimation (O-E) retrieval steps. The CrIS instrument has three bands that span the infrared spectrum as follows: the longwave band (**LW**, 660–1095  $\text{cm}^{-1}$ , 713 total channels), the midwave (**MW**, 1210–1750  $\text{cm}^{-1}$ , 865 total channels) and the shortwave band (**SW**, 2155–2550  $\text{cm}^{-1}$ , 633 total channels).

| Experiments     | Summary                                                                                                                                                                                                                                                                                                                                                                                                                                                                                                                                                                                                                                                                                                                                                                                                                                                                                                                                                                                                                                                                |
|-----------------|------------------------------------------------------------------------------------------------------------------------------------------------------------------------------------------------------------------------------------------------------------------------------------------------------------------------------------------------------------------------------------------------------------------------------------------------------------------------------------------------------------------------------------------------------------------------------------------------------------------------------------------------------------------------------------------------------------------------------------------------------------------------------------------------------------------------------------------------------------------------------------------------------------------------------------------------------------------------------------------------------------------------------------------------------------------------|
| <b>LW+MW+SW</b> | <ul style="list-style-type: none"><li>- Regression coefficients calculated using all 2211 CrIS channels from the <b>LW</b>, <b>MW</b> and <b>SW</b> bands.</li><li>- O-E retrieval of temperature, water vapor and surface parameters with channel subsets as specified in <b>Table S2</b>.</li><li>- O-E retrieval of <u>all seven</u> trace gas species (<math>\text{O}_3</math>, <math>\text{CO}_2</math>, <math>\text{CO}</math>, <math>\text{CH}_4</math>, <math>\text{HNO}_3</math>, <math>\text{SO}_2</math> and <math>\text{N}_2\text{O}</math>) with channel subsets as specified in <b>Table S6</b>.</li></ul>                                                                                                                                                                                                                                                                                                                                                                                                                                               |
| <b>LW+MW</b>    | <ul style="list-style-type: none"><li>- Regression coefficients calculated using the 1578 CrIS channels from the <b>LW</b> and <b>MW</b> bands <u>only</u>. The 633 CrIS channels from the <b>SW</b> band were omitted.</li><li>- O-E retrieval of temperature, water vapor and surface parameters with channel subsets as specified in <b>Table S3</b>.</li><li>- O-E retrieval of <u>six</u> trace gas species (<math>\text{O}_3</math>, <math>\text{CO}_2</math>, <math>\text{CH}_4</math>, <math>\text{HNO}_3</math>, <math>\text{SO}_2</math> and <math>\text{N}_2\text{O}</math>) with channel subsets as specified in <b>Table S6</b>. The retrieval of <math>\text{CO}</math> was omitted due to the lack of any channels sensitive to <math>\text{CO}</math> in the <b>LW</b> and <b>MW</b> bands (See <b>Figure 2</b>).</li></ul>                                                                                                                                                                                                                            |
| <b>MW+SW</b>    | <ul style="list-style-type: none"><li>- Regression coefficients calculated using the 1498 CrIS channels from the <b>MW</b> and <b>SW</b> bands <u>only</u>. The 713 CrIS channels from the <b>LW</b> band were omitted. Note: We built regression coefficients with and without non-LTE sensitive channels (2255.0–2383.0 <math>\text{cm}^{-1}</math>) but only show the regression retrieval results without non-LTE sensitive channels in the paper.</li><li>- O-E retrieval of temperature, water vapor and surface parameters with channel subsets as specified in <b>Table S4</b>.</li><li>- O-E retrieval of <u>four</u> trace gas species (<math>\text{CO}</math>, <math>\text{CH}_4</math>, <math>\text{SO}_2</math> and <math>\text{N}_2\text{O}</math>) with channel subsets as specified in <b>Table S6</b>. The retrieval of <math>\text{O}_3</math>, <math>\text{CO}_2</math> and <math>\text{HNO}_3</math> were omitted due to the lack of any channels sensitive to these species in the <b>MW</b> and <b>SW</b> bands (See <b>Figure 2</b>).</li></ul> |
| <b>LW+SW</b>    | <ul style="list-style-type: none"><li>- Regression coefficients calculated using the 1346 CrIS channels from the <b>LW</b> and <b>SW</b> bands <u>only</u>. The 865 CrIS channels from the <b>MW</b> band were omitted.</li><li>- O-E retrieval of temperature, water vapor and surface parameters with channel subsets as specified in <b>Table S5</b>.</li></ul>                                                                                                                                                                                                                                                                                                                                                                                                                                                                                                                                                                                                                                                                                                     |

|  |                                                                                                                                                                                                                                                                                                                                                                      |
|--|----------------------------------------------------------------------------------------------------------------------------------------------------------------------------------------------------------------------------------------------------------------------------------------------------------------------------------------------------------------------|
|  | - O-E retrieval of <u>four</u> trace gas species (O <sub>3</sub> , CO <sub>2</sub> , CO and HNO <sub>3</sub> ) with channel subsets as specified in <b>Table S6</b> . The retrieval of CH <sub>4</sub> , SO <sub>2</sub> and N <sub>2</sub> O were omitted due to the lack of any channels sensitive to these species in the LW and SW bands (See <b>Figure 2</b> ). |
|--|----------------------------------------------------------------------------------------------------------------------------------------------------------------------------------------------------------------------------------------------------------------------------------------------------------------------------------------------------------------------|

**Table S2:** The CrIS channel subsets for temperature (T<sub>p</sub>), water vapor (H<sub>2</sub>O<sub>vap</sub>) and surface parameters (surface skin temperature, emissivity and reflectivity) that NUCAPS employs in its Optimal Estimation retrieval step. Channels are selected from the CrIS bands, namely the longwave (**LW**, 660–1095 cm<sup>-1</sup>, 713 total channels), the midwave (**MW**, 1210–1750 cm<sup>-1</sup>, 865 total channels) and the shortwave band (**SW**, 2155–2550 cm<sup>-1</sup>, 633 total channels). This table summarizes the channels used in the baseline experiment that employed all available CrIS bands, **LW+MW+SW**. The shaded lists denote channels used during the second O-E retrieval of T<sub>p</sub>.

| Parameter                       | CrIS band | Infrared wavenumber [cm <sup>-1</sup> ]                                                                                                                                                                                                                                                                                                                                                                                                                                                                                                                                                                                            |
|---------------------------------|-----------|------------------------------------------------------------------------------------------------------------------------------------------------------------------------------------------------------------------------------------------------------------------------------------------------------------------------------------------------------------------------------------------------------------------------------------------------------------------------------------------------------------------------------------------------------------------------------------------------------------------------------------|
| T <sub>p</sub>                  | <b>LW</b> | 666.250, 667.500, 668.750, 669.375, 670.000, 672.500, 681.250, 687.500, 688.750, 689.375, 690.000, 691.250, 692.500, 693.750, 695.000, 696.250, 697.500, 698.750, 699.375, 700.000, 701.250, 702.500, 703.750, 704.375, 706.250, 707.500, 708.750, 710.000, 711.250, 712.500, 715.625, 717.500, 718.130, 718.750, 720.000, 721.250, 721.875, 723.130, 723.750, 724.380, 726.250, 726.875, 727.500, 728.125, 731.875, 734.375, 735.000, 738.125, 740.000, 741.875, 743.125, 745.625, 747.500, 749.380, 779.380, 784.380, 794.375, 796.880, 798.130, 799.375, 800.625, 803.750, 815.000, 816.250, 826.875, 928.750, 945.000, 952.500 |
|                                 | <b>MW</b> | 1398.75, 1406.25, 1471.88, 1476.25, 1498.10, 1555.63, 1559.38, 1700.00, 1730.00, 1732.50, 1733.75, 1736.25                                                                                                                                                                                                                                                                                                                                                                                                                                                                                                                         |
|                                 | <b>SW</b> | 2198.75, 2201.88, 2207.50, 2220.00, 2222.50, 2224.38, 2255.00, 2260.00, 2263.75, 2266.25, 2270.00, 2272.50, 2277.50, 2280.00, 2282.50, 2285.00, 2287.50, 2292.50, 2293.75, 2295.62, 2297.50, 2303.12, 2305.00, 2307.50, 2312.50, 2316.88, 2322.50, 2324.38, 2330.00, 2331.88, 2338.12, 2343.12, 2348.12, 2357.50, 2360.00, 2365.00, 2367.50, 2370.00, 2372.50, 2375.00, 2377.50, 2380.00, 2380.62, 2381.25, 2381.88, 2382.50, 2383.12, 2383.75, 2384.38, 2385.00, 2385.63, 2386.25, 2386.88, 2387.50, 2388.12, 2388.75, 2389.38, 2390.00, 2390.62, 2391.25, 2391.88, 2392.50, 2393.12, 2393.75, 2405.00, 2412.50                   |
| H <sub>2</sub> O <sub>vap</sub> | <b>LW</b> | 779.380, 784.380, 794.375, 796.880, 798.130, 799.375, 800.625, 803.750, 815.000, 816.250, 826.875, 928.750, 945.000, 952.500, 1091.25                                                                                                                                                                                                                                                                                                                                                                                                                                                                                              |
|                                 | <b>MW</b> | 1213.13, 1310.00, 1315.00, 1320.00, 1330.63, 1335.00, 1345.00, 1357.50, 1367.50, 1381.88, 1384.38, 1386.88, 1393.75, 1395.00, 1397.50, 1398.75, 1400.00, 1401.25, 1403.13, 1406.25, 1407.50, 1410.00, 1412.50, 1415.00, 1416.25, 1417.50, 1421.88, 1424.38, 1426.25, 1427.50, 1428.75, 1430.00, 1435.00, 1438.13, 1442.50, 1468.13, 1471.88, 1476.25, 1498.13, 1555.63, 1559.38, 1575.00, 1585.63, 1605.00, 1685.63, 1700.00, 1730.00, 1732.50, 1733.75, 1736.25, 1745.00                                                                                                                                                          |

|      |    |                                                                                                                                                                                                                                                                                                                  |
|------|----|------------------------------------------------------------------------------------------------------------------------------------------------------------------------------------------------------------------------------------------------------------------------------------------------------------------|
| Surf | LW | 789.375, 790.625, 823.750, 833.750, 843.750, 845.000, 899.375, 901.875, 904.375, 907.500, 911.250, 912.500, 916.250, 920.000, 927.500, 933.750, 935.625, 937.500, 939.375, 943.125, 946.250, 951.875, 956.250, 957.500, 962.500, 968.750, 980.000, 985.000, 1093.13, 1095.00                                     |
|      | MW | 1231.25, 1234.38                                                                                                                                                                                                                                                                                                 |
|      | SW | 2461.88, 2463.13, 2464.38, 2465.00, 2470.63, 2472.50, 2476.25, 2481.25, 2485.00, 2486.88, 2488.75, 2490.63, 2492.50, 2495.00, 2496.88, 2498.13, 2499.38, 2501.25, 2503.75, 2505.63, 2507.50, 2510.00, 2513.75, 2516.88, 2518.75, 2521.25, 2523.13, 2525.00, 2527.50, 2531.88, 2535.63, 2540.00, 2541.88, 2543.13 |

**Table S3:** Same as Table S1 except for the LW+MW experiment. The shaded lists denote channels used during the second O-E retrieval of  $T_p$ .

| Parameter                         | CrIS band | Infrared wavenumber [ $\text{cm}^{-1}$ ]                                                                                                                                                                                                                                                                                                                                                                                                                                                                                                                                                                                           |
|-----------------------------------|-----------|------------------------------------------------------------------------------------------------------------------------------------------------------------------------------------------------------------------------------------------------------------------------------------------------------------------------------------------------------------------------------------------------------------------------------------------------------------------------------------------------------------------------------------------------------------------------------------------------------------------------------------|
| $T_p$                             | LW        | 666.250, 667.500, 668.750, 669.375, 670.000, 672.500, 681.250, 687.500, 688.750, 689.375, 690.000, 691.250, 692.500, 693.750, 695.000, 696.250, 697.500, 698.750, 699.375, 700.000, 701.250, 702.500, 703.750, 704.375, 706.250, 707.500, 708.750, 710.000, 711.250, 712.500, 715.625, 717.500, 718.130, 718.750, 720.000, 721.250, 721.875, 723.130, 723.750, 724.380, 726.250, 726.875, 727.500, 728.125, 731.875, 734.375, 735.000, 738.125, 740.000, 741.875, 743.125, 745.625, 747.500, 749.380, 779.380, 784.380, 794.375, 796.880, 798.130, 799.375, 800.625, 803.750, 815.000, 816.250, 826.875, 928.750, 945.000, 952.500 |
|                                   | MW        | 1398.75, 1406.25, 1471.88, 1476.25, 1498.13, 1555.63, 1559.38, 1700.00, 1730.00, 1732.50, 1733.75, 1736.25                                                                                                                                                                                                                                                                                                                                                                                                                                                                                                                         |
| $\text{H}_2\text{O}_{\text{vap}}$ | LW        | 779.380, 784.380, 794.375, 796.880, 798.130, 799.375, 800.625, 803.750, 815.000, 816.250, 826.875, 928.750, 945.000, 952.500, 1091.25                                                                                                                                                                                                                                                                                                                                                                                                                                                                                              |
|                                   | MW        | 1213.13, 1310.00, 1315.00, 1320.00, 1330.63, 1335.00, 1345.00, 1357.50, 1367.50, 1381.88, 1384.38, 1386.88, 1393.75, 1395.00, 1397.50, 1398.75, 1400.00, 1401.25, 1403.13, 1406.25, 1407.50, 1410.00, 1412.50, 1415.00, 1416.25, 1417.50, 1421.88, 1424.38, 1426.25, 1427.50, 1428.75, 1430.00, 1435.00, 1438.13, 1442.50, 1468.13, 1471.88, 1476.25, 1498.13, 1555.63, 1559.38, 1575.00, 1585.63, 1605.00, 1685.63, 1700.00, 1730.00, 1732.50, 1733.75, 1736.25, 1745.00                                                                                                                                                          |
| Surf                              | LW        | 789.375, 790.625, 823.750, 833.750, 843.750, 845.000, 899.375, 901.875, 904.375, 907.500, 911.250, 912.500, 916.250, 920.000, 927.500, 933.750, 935.625, 937.500, 939.375, 943.125, 946.250, 951.875, 956.250, 957.500, 962.500, 968.750, 980.000, 985.000, 1093.13, 1095.00                                                                                                                                                                                                                                                                                                                                                       |
|                                   | MW        | 1231.25, 1234.38                                                                                                                                                                                                                                                                                                                                                                                                                                                                                                                                                                                                                   |

**Table S4:** Same as Table S1 except for the **MW+SW** experiments. The shaded lists denote channels used during the second O-E retrieval of  $T_p$ .

| Parameter                         | CrIS band | Infrared wavenumber [ $\text{cm}^{-1}$ ]                                                                                                                                                                                                                                                                                                                                                                                                                                                                                                                                                                         |
|-----------------------------------|-----------|------------------------------------------------------------------------------------------------------------------------------------------------------------------------------------------------------------------------------------------------------------------------------------------------------------------------------------------------------------------------------------------------------------------------------------------------------------------------------------------------------------------------------------------------------------------------------------------------------------------|
| $T_p$                             | <b>MW</b> | 1398.75, 1406.25, 1471.88, 1476.25, 1498.13, 1555.63, 1559.38, 1700.00, 1730.00, 1732.50, 1733.75, 1736.25                                                                                                                                                                                                                                                                                                                                                                                                                                                                                                       |
|                                   | <b>SW</b> | 2198.75, 2201.88, 2207.50, 2220.00, 2222.50, 2224.38, 2255.00, 2260.00, 2263.75, 2266.25, 2270.00, 2272.500, 2277.5, 2280.00, 2282.50, 2285.00, 2287.50, 2292.50, 2293.75, 2295.62, 2297.50, 2303.12, 2305.00, 2307.50, 2312.50, 2316.88, 2322.50, 2324.38, 2330.00, 2331.88, 2338.12, 2343.12, 2348.12, 2357.50, 2360.00, 2365.00, 2367.50, 2370.00, 2372.50, 2375.00, 2377.50, 2380.00, 2380.62, 2381.25, 2381.88, 2382.50, 2383.12, 2383.75, 2384.38, 2385.00, 2385.63, 2386.25, 2386.88, 2387.50, 2388.12, 2388.75, 2389.38, 2390.00, 2390.62, 2391.25, 2391.88, 2392.50, 2393.12, 2393.75, 2405.00, 2412.50 |
| $\text{H}_2\text{O}_{\text{vap}}$ | <b>MW</b> | 1213.13, 1310.00, 1315.00, 1320.00, 1330.63, 1335.00, 1345.00, 1357.50, 1367.50, 1381.88, 1384.38, 1386.88, 1393.75, 1395.00, 1397.50, 1398.75, 1400.00, 1401.25, 1403.13, 1406.25, 1407.50, 1410.00, 1412.50, 1415.00, 1416.25, 1417.50, 1421.88, 1424.38, 1426.25, 1427.50, 1428.75, 1430.00, 1435.00, 1438.13, 1442.50, 1468.13, 1471.88, 1476.25, 1498.13, 1555.63, 1559.38, 1575.00, 1585.63, 1605.00, 1685.63, 1700.00, 1730.00, 1732.50, 1733.75                                                                                                                                                          |
| Surf                              | <b>MW</b> | 1231.25, 1234.38                                                                                                                                                                                                                                                                                                                                                                                                                                                                                                                                                                                                 |
|                                   | <b>SW</b> | 2461.88, 2463.13, 2464.38, 2465.00, 2470.63, 2472.50, 2476.25, 2481.25, 2485.00, 2486.88, 2488.75, 2490.63, 2492.50, 2495.00, 2496.88, 2498.13, 2499.38, 2501.25, 2503.75, 2505.63, 2507.50, 2510.00, 2513.75, 2516.88, 2518.75, 2521.25, 2523.13, 2525.00, 2527.50, 2531.88, 2535.63, 2540.00, 2541.88, 2543.13                                                                                                                                                                                                                                                                                                 |

**Table S5:** Same as Table A.1 except for the **LW+SW** experiments. The shaded lists denote channels used during the second O-E retrieval of  $T_p$ .

| Parameter | CrIS band | Infrared wavenumber [ $\text{cm}^{-1}$ ]                                                                                                                                                                                                                                                                                                                                                                                                                                                                                                                                                                                                                               |
|-----------|-----------|------------------------------------------------------------------------------------------------------------------------------------------------------------------------------------------------------------------------------------------------------------------------------------------------------------------------------------------------------------------------------------------------------------------------------------------------------------------------------------------------------------------------------------------------------------------------------------------------------------------------------------------------------------------------|
| $T_p$     | <b>LW</b> | 666.250, 667.500, 668.750, 669.375, 670.000, 672.500, 681.250, 687.500, 688.750, 689.375, 690.000, 691.250, 692.500, 693.750, 695.000, 696.250, 697.500, 698.750, 699.375, 700.000, 701.250, 702.500, 703.750, 704.375, 706.250, 707.500, 708.750, 710.000, 711.250, 712.500, 715.625, 717.500, 718.130, 718.750, 720.000, 721.250, 721.875, 723.130, 723.750, 724.380, 726.250, 726.875, 727.500, 728.125, 731.875, 734.375, 735.000, 738.125, 740.000, 741.875, 743.125, 745.625, 747.500, 749.380, 730.625, 744.375, 754.375, 776.875, 779.375, 784.375, 794.375, 796.880, 798.750, 799.375, 800.625, 803.125, 808.125, 814.375, 816.250, 827.500, 908.750, 948.125 |

|                         |    |                                                                                                                                                                                                                                                                                                                                                                                                                                                                                                                                                                                                                  |
|-------------------------|----|------------------------------------------------------------------------------------------------------------------------------------------------------------------------------------------------------------------------------------------------------------------------------------------------------------------------------------------------------------------------------------------------------------------------------------------------------------------------------------------------------------------------------------------------------------------------------------------------------------------|
|                         | SW | 2198.75, 2201.88, 2207.50, 2220.00, 2222.50, 2224.38, 2255.00, 2260.00, 2263.75, 2266.25, 2270.00, 2272.50, 2277.50, 2280.00, 2282.50, 2285.00, 2287.50, 2292.50, 2293.75, 2295.62, 2297.50, 2303.12, 2305.00, 2307.50, 2312.50, 2316.88, 2322.50, 2324.38, 2330.00, 2331.88, 2338.12, 2343.12, 2348.12, 2357.50, 2360.00, 2365.00, 2367.50, 2370.00, 2372.50, 2375.00, 2377.50, 2380.00, 2380.62, 2381.25, 2381.88, 2382.50, 2383.12, 2383.75, 2384.38, 2385.00, 2385.63, 2386.25, 2386.88, 2387.50, 2388.12, 2388.75, 2389.38, 2390.00, 2390.62, 2391.25, 2391.88, 2392.50, 2393.12, 2393.75, 2405.00, 2412.50 |
| H <sub>2</sub> O<br>vap | LW | 730.625, 744.375, 754.375, 776.875, 779.375, 784.375, 794.375, 796.880, 798.750, 799.375, 800.625, 803.125, 808.125, 814.375, 816.250, 827.500, 908.750, 948.125                                                                                                                                                                                                                                                                                                                                                                                                                                                 |
| Surf                    | LW | 789.375, 790.625, 823.750, 833.750, 843.750, 845.000, 899.375, 901.875, 904.375, 907.500, 911.250, 912.500, 916.250, 920.000, 927.500, 933.750, 935.625, 937.500, 939.375, 943.125, 946.250, 951.875, 956.250, 957.500, 962.500, 968.750, 980.000, 985.000, 1093.13, 1095.00                                                                                                                                                                                                                                                                                                                                     |
|                         | SW | 2461.88, 2463.13, 2464.38, 2465.00, 2470.63, 2472.50, 2476.25, 2481.25, 2485.00, 2486.88, 2488.75, 2490.63, 2492.50, 2495.00, 2496.88, 2498.13, 2499.38, 2501.25, 2503.75, 2505.63, 2507.50, 2510.00, 2513.75, 2516.88, 2518.75, 2521.25, 2523.13, 2525.00, 2527.50, 2531.88, 2535.63, 2540.00, 2541.88, 2543.13                                                                                                                                                                                                                                                                                                 |

**Table S6:** Summary of channels used for seven trace gas species; Ozone (O<sub>3</sub>), Carbon Dioxide (CO<sub>2</sub>), Methane (CH<sub>4</sub>), Nitric Acid (HNO<sub>3</sub>), Carbon Monoxide (CO), Nitrous Oxide (N<sub>2</sub>O) and Sulfur Dioxide(SO<sub>2</sub>). The channels subsets are selected based on the spectral signatures as depicted in **Figure 2**.

| Parameter       | CrIS band | Infrared wavenumber [cm <sup>-1</sup> ]                                                                                                                                                                                                                                                                                                                                                                                                                                                                                                                                                                                                                                                                              |
|-----------------|-----------|----------------------------------------------------------------------------------------------------------------------------------------------------------------------------------------------------------------------------------------------------------------------------------------------------------------------------------------------------------------------------------------------------------------------------------------------------------------------------------------------------------------------------------------------------------------------------------------------------------------------------------------------------------------------------------------------------------------------|
| O <sub>3</sub>  | LW        | 996.875, 997.500, 998.125, 999.380, 1000.00, 1000.63, 1001.88, 1002.50, 1003.13, 1005.00, 1005.63, 1007.50, 1008.13, 1010.00, 1011.88, 1012.50, 1013.13, 1014.38, 1015.00, 1015.63, 1016.25, 1016.88, 1018.13, 1018.75, 1019.38, 1020.00, 1020.63, 1021.25, 1021.88, 1022.50, 1023.13, 1023.75, 1024.38, 1025.00, 1025.63, 1026.25, 1026.88, 1028.75, 1031.25, 1031.88, 1032.50, 1033.13, 1033.75, 1034.38, 1035.00, 1035.63, 1036.25, 1036.88, 1037.50, 1038.13, 1038.75, 1040.63, 1041.25, 1041.88, 1045.63, 1047.50, 1048.13, 1049.38, 1050.00, 1050.63, 1051.25, 1051.88, 1053.13, 1053.75, 1054.38, 1055.63, 1056.25, 1056.88, 1057.50, 1058.13, 1058.75, 1060.00, 1060.63, 1061.25, 1063.75, 1066.25, 1068.13, |
| CO <sub>2</sub> | LW        | 666.250, 667.500, 668.750, 669.375, 670.000, 672.500, 681.250, 687.500, 688.750, 689.375, 690.000, 691.250, 692.500, 693.750, 695.000, 696.250, 697.500, 698.750, 699.375, 700.000, 701.250, 702.500, 703.750, 704.375, 706.250, 707.500, 708.750, 710.000, 711.250, 712.500, 715.625, 717.500, 718.130, 718.750, 720.000, 721.250, 721.875, 723.130, 723.750, 724.380, 726.250, 726.875, 727.500, 728.125, 731.875, 734.375, 735.000, 738.125, 740.000, 741.875, 743.125, 745.625, 747.500, 749.380,                                                                                                                                                                                                                |
| CH <sub>4</sub> | MW        | 1220.00, 1228.75, 1229.38, 1230.00, 1236.25, 1237.50, 1238.75, 1241.25, 1242.50, 1245.63, 1246.25, 1246.88, 1247.50, 1250.00, 1252.50, 1253.13, 1253.75, 1255.00, 1256.25, 1260.00, 1261.25, 1261.88, 1262.50, 1263.13, 1263.75, 1265.00, 1265.63, 1267.50, 1268.13, 1268.75,                                                                                                                                                                                                                                                                                                                                                                                                                                        |

|                  |    |                                                                                                                                                                                                                                                                                                                                                                                                                                                                                                      |
|------------------|----|------------------------------------------------------------------------------------------------------------------------------------------------------------------------------------------------------------------------------------------------------------------------------------------------------------------------------------------------------------------------------------------------------------------------------------------------------------------------------------------------------|
|                  |    | 1269.38, 1270.00, 1271.25, 1275.00, 1275.63, 1276.25, 1276.88, 1277.50, 1281.25, 1281.88, 1282.50, 1283.13, 1283.75, 1287.50, 1288.13, 1288.75, 1290.00, 1292.50, 1294.38, 1295.00, 1296.25, 1297.50, 1300.00, 1301.25, 1301.88, 1302.50, 1303.13, 1303.75, 1304.38, 1305.00, 1305.63, 1306.25, 1307.50, 1311.25, 1312.50, 1316.88, 1317.50, 1321.25, 1321.88, 1322.50, 1327.50, 1328.75, 1332.50, 1337.50, 1341.25, 1342.50, 1346.25, 1346.88, 1347.50, 1351.25, 1355.63, 1356.25, 1360.63, 1365.63 |
| HNO <sub>3</sub> | LW | 846.250, 847.500, 851.250, 855.625, 857.500, 858.125, 860.625, 861.875, 862.500, 867.500, 869.375, 873.125, 875.000, 876.875, 880.000, 881.875, 885.625, 893.125, 894.375, 895.625, 898.750, 900.000, 901.250, 902.500, 904.375, 907.500, 911.250, 912.500, 920.000, 923.125                                                                                                                                                                                                                         |
| CO               | SW | 2155.00, 2157.50, 2158.13, 2158.75, 2159.38, 2160.00, 2161.88, 2162.50, 2164.38, 2165.00, 2165.63, 2166.25, 2167.50, 2168.75, 2169.38, 2170.00, 2170.63, 2172.50, 2173.13, 2174.38, 2175.00, 2176.25, 2176.88, 2177.50, 2178.13, 2179.38, 2180.00, 2182.50, 2183.13, 2185.00, 2186.88, 2187.50, 2188.75, 2190.00, 2191.25                                                                                                                                                                            |
| N <sub>2</sub> O | MW | 1274.38, 1275.00, 1275.63, 1276.25, 1276.88, 1277.50, 1278.13, 1278.75, 1279.38, 1281.88, 1282.50, 1285.00, 1285.63, 1291.88, 1292.50, 1295.63, 1296.25, 1298.13, 1298.75, 1299.38, 1300.63                                                                                                                                                                                                                                                                                                          |
| SO <sub>2</sub>  | MW | 1345.00, 1350.00, 1352.50, 1354.38, 1357.50, 1358.75, 1359.38, 1360.00, 1360.63, 1361.25, 1361.88, 1362.50, 1367.50, 1370.00, 1370.63, 1371.25, 1371.88, 1372.50, 1374.38, 1375.00, 1375.63, 1376.25, 1376.88, 1377.50, 1379.38, 1380.00, 1381.88, 1382.50, 1383.75, 1384.38, 1385.00                                                                                                                                                                                                                |
